# Supplementary material for: Structural stability and evolution of half-metallicity in Ba2CaMoO6: interplay of hole- and electron-doping
Source: Royal Society of Chemistry journal article supplement (doi:10.1039/d1cp03247j), 2021-01-01
Supplement: d1cp03247j1.pdf [file d1cp03247j1.pdf]

## Supporting Information

### Structural Stability and Evolution of Half-Metallicity in $\text{Ba}_2\text{CaMoO}_6$ : Interplay of Hole- and Electron-Doping

S. Faiza-Rubab,<sup>‡</sup> Shahnaila Naseem,<sup>‡</sup> Syed Muhammad Alay-e-Abbas,<sup>†§</sup> M. Zulfiqar,<sup>‡</sup> Y. Zhao,<sup>¶</sup> and S. Nazir,<sup>‡\*</sup>

<sup>‡</sup>*Department of Physics, University of Sargodha, 40100 Sargodha, Pakistan.*

<sup>¶</sup>*Department of Physics, Yantai University, Yantai 264005, People's Republic of China.*

<sup>†</sup>*Applied Physics, Division of Materials Science,*

*Department of Engineering Sciences and Mathematics,*

*Luleå University of Technology, 97187 Luleå, Sweden. and*

<sup>§</sup>*Computational Materials Modeling Laboratory, Department of Physics,*  
*Government College University, Faisalabad, 38040, Faisalabad, Pakistan.*

---

\* Electronic address: [safdar.nazir@uos.edu.pk](mailto:safdar.nazir@uos.edu.pk)

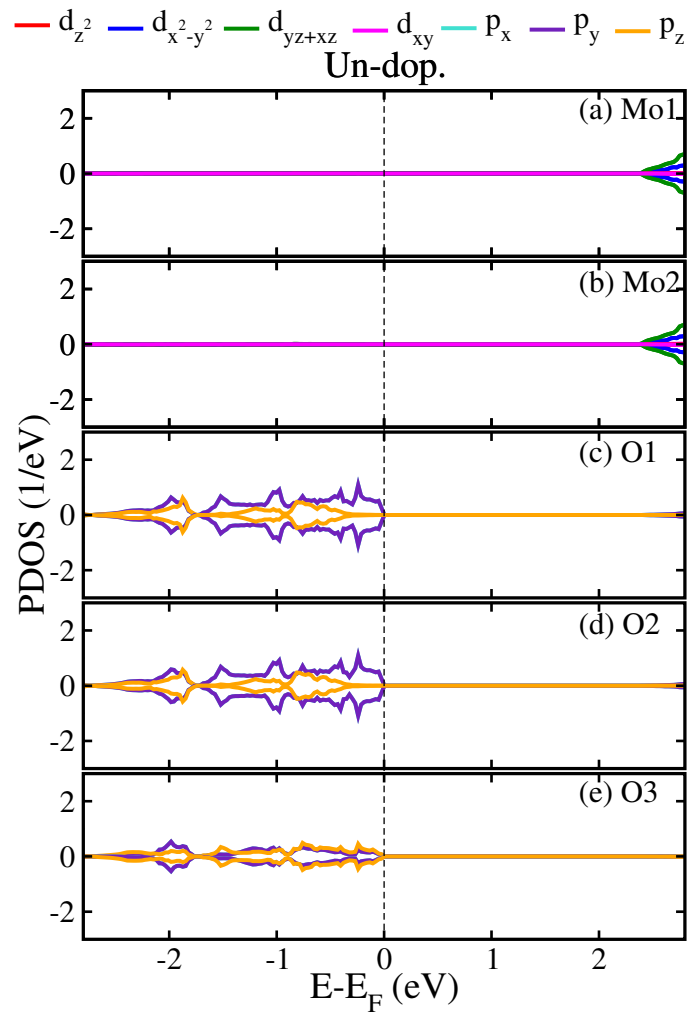

FIG. 1S: Calculated spin-polarized (a) Mo1, (b) Mo2 4d, (c) O1, (d) O2, and (e) O3 2p orbital resolved partial density of states (PDOS) in undoped  $\text{Ba}_2\text{CaMoO}_6$  system.

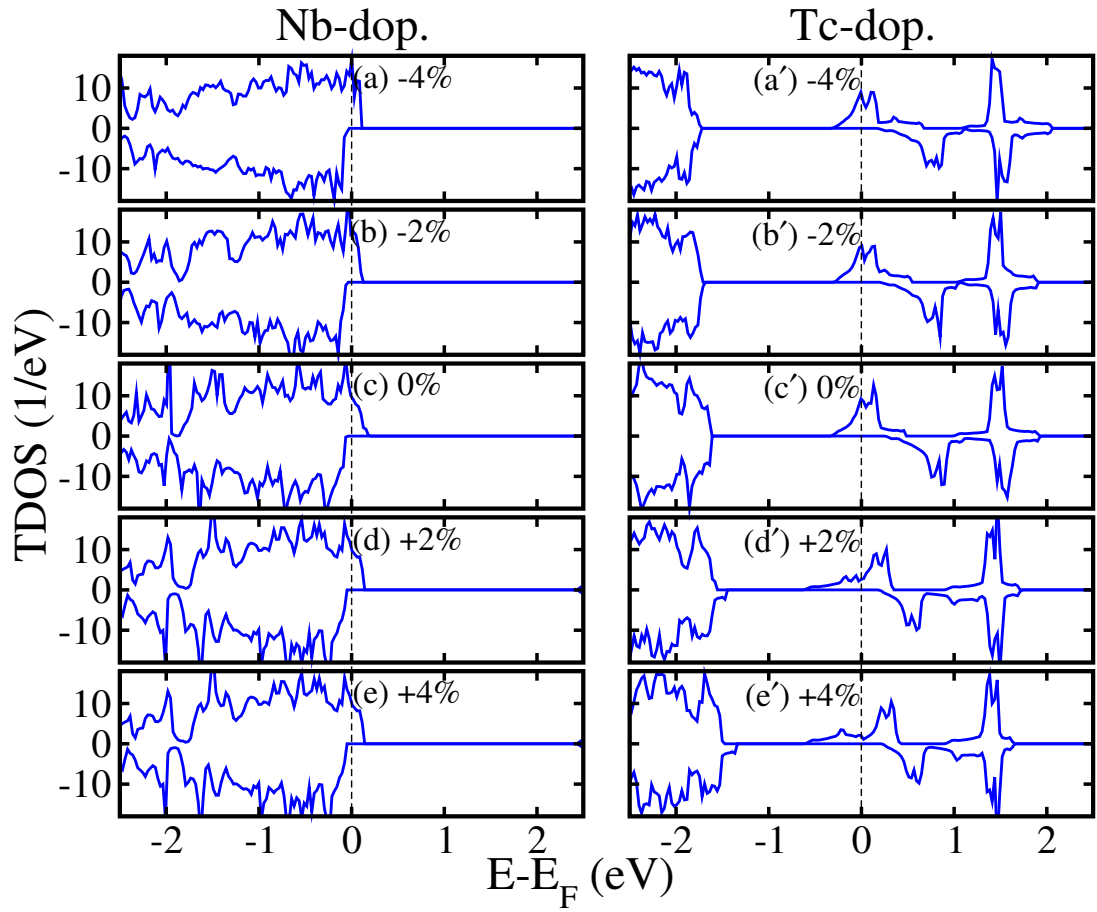

FIG. 2S: Calculated spin-polarized total density of states (TDOS) for (a/a') -4%, (b/b') -2%, (c/c') 0% (unstrained), (d/d') -2%, and (e/e') +4% biaxial strains in Nb(left column)/Tc(right column)-doped  $\text{Ba}_2\text{CaMO}_6$  systems. The “-” and “+” signs show compressive and tensile strains, respectively.
